# Supplementary material for: Nesfatin-1 protects dopaminergic neurons against MPP+/MPTP-induced neurotoxicity through the C-Raf–ERK1/2-dependent anti-apoptotic pathway
Source: PubMed Central journal article supplement (PMC5247731; doi:10.1038/srep40961), 2017-01-20
Supplement: srep40961-s1.pdf [file srep40961-s1.pdf]

**Nesfatin-1 protects dopaminergic neurons against MPP<sup>+</sup>/MPTP-induced neurotoxicity through the C-Raf–ERK1/2-dependent anti-apoptotic pathway**

Xiao-Li SHEN<sup>1</sup>, Ning SONG<sup>1</sup>, Xi-Xun DU<sup>1</sup>, Yong LI<sup>1</sup>, Jun-Xia XIE<sup>1</sup>, \*Hong JIANG<sup>1</sup>

<sup>1</sup> Department of Physiology, Shandong Provincial Key Laboratory of Pathogenesis and Prevention of Neurological Disorders and State Key Disciplines: Physiology, Medical College of Qingdao University, Qingdao, 266071, China

\* Address correspondence to:

Hong Jiang (professor)

Department of Physiology, Medical College of Qingdao University, Qingdao, 266071, China.

Tel: 86-532-83780191

Fax: 86-532-83780136

EMAIL: hongjiang@qdu.edu.cn (H. Jiang)

SUPPLEMENTARY INFORMATION includes:

Supplementary Figures S2, S5, S6

**TH**  
**60kDa**

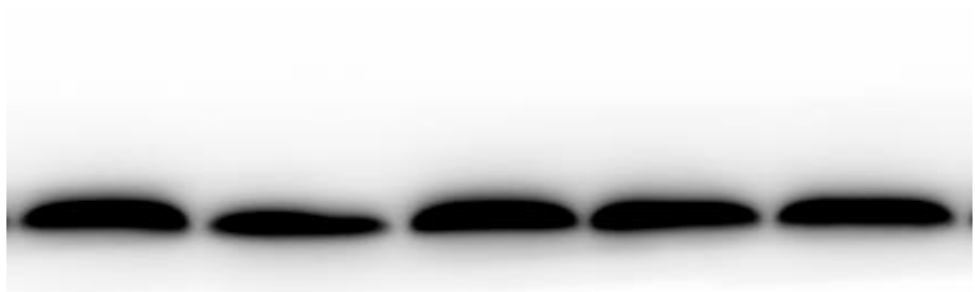

**Control**    **MPTP**    **100**    **200**    **400**  
**MPTP+Nesfatin-1 (ng/μL)**

**β-actin**  
**43kDa**

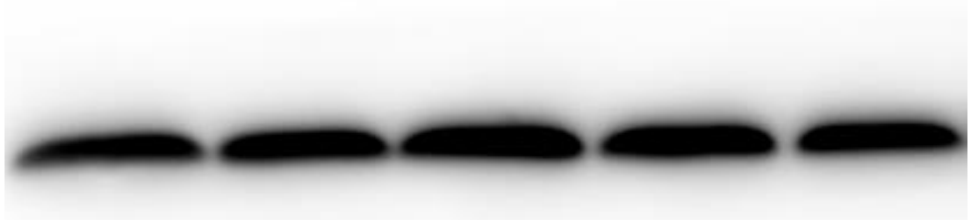

**Control**    **MPTP**    **100**    **200**    **400**  
**MPTP+Nesfatin-1 (ng/μL)**

Supplementary Figure S2: Western blots showing the different TH and  $\beta$ -actin levels in control, MPTP and MPTP+Nesfatin-1 group.

**Cytochrome c  
in mitochondria  
15kDa**

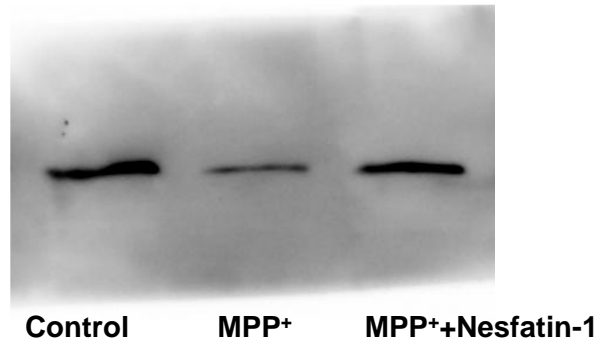

**COXIV  
in mitochondria  
17kDa**

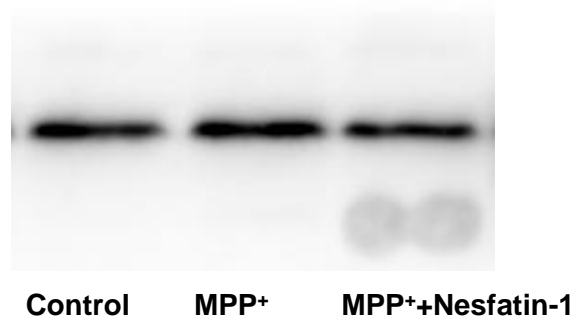

**Cytochrome c  
in cytoplasm  
15kDa**

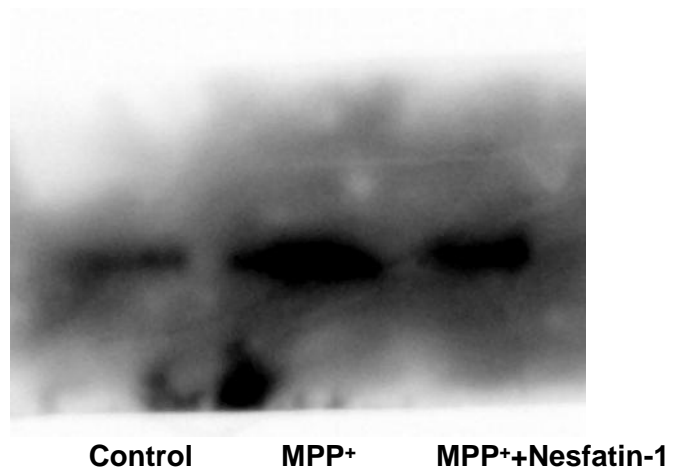

**$\beta$ -actin  
in cytoplasm  
43kDa**

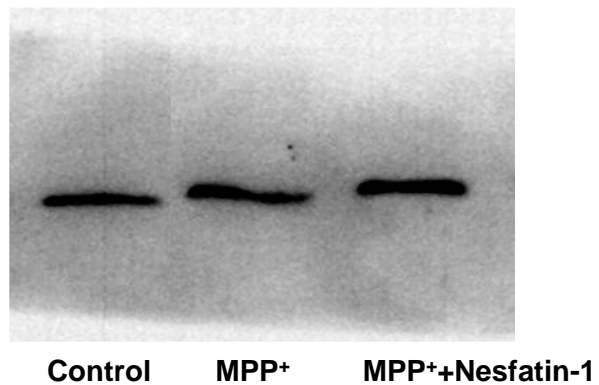

Supplementary Figure S5: Western blots showing the Cytochrome c, COXIV,  $\beta$ -actin levels in control, MPP<sup>+</sup> and MPP<sup>+</sup>+Nesfatin-1 group in the mitochondria and cytoplasm.

**P-ERK**  
44kDa  
42kDa

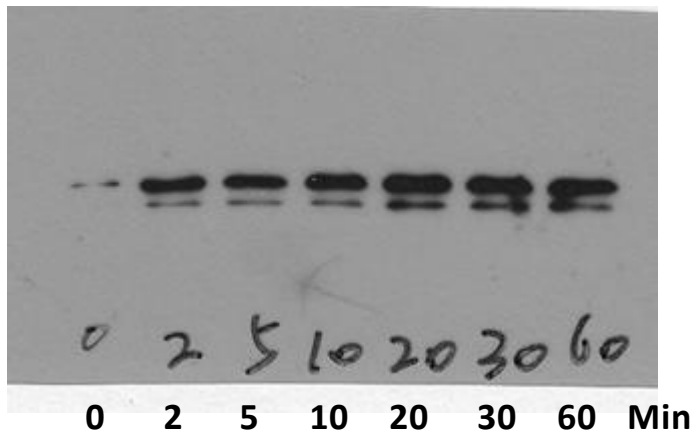

**ERK**  
44kDa  
42kDa

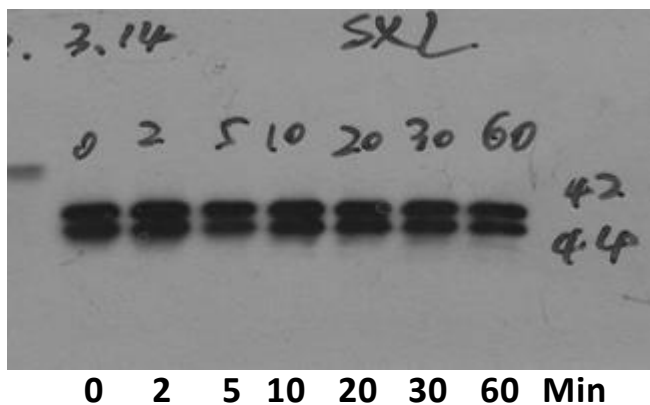

**P-ERK**  
44kDa  
42kDa

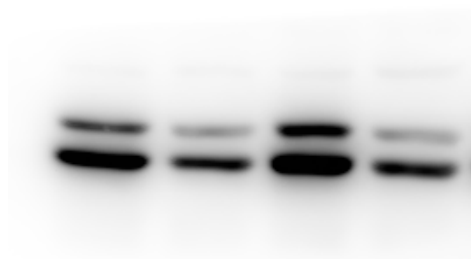

|            |   |   |   |   |
|------------|---|---|---|---|
| PD98059    | - | + | - | + |
| Nesfatin-1 | - | - | + | + |

**ERK**  
44kDa  
42kDa

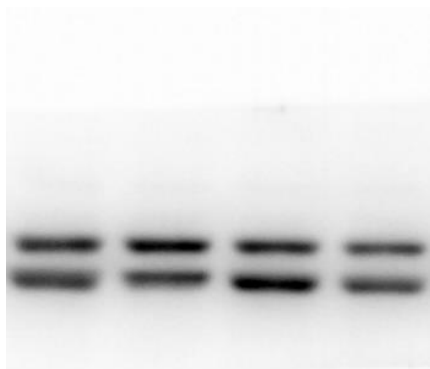

|            |   |   |   |   |
|------------|---|---|---|---|
| PD98059    | - | + | - | + |
| Nesfatin-1 | - | - | + | + |

Supplementary Figure S6: Western blots showing the ERK, p-ERK, levels changes after treatment with nesfatin-1 and PD98059.
